# Supplementary material
Source: publisher site journal article supplement (https://static.cambridge.org/content/id/urn:cambridge.org:id:article:S0317167120001304/resource/name/S0317167120001304supp001.docx)
Supplement: Supplementary file 1 [file S0317167120001304supp001.docx]

VIDEO LEGENDS

Video 1: Demonstrates repeated groping of the right hand by the left hand with no volitional control

Video 2: Demonstrates involuntary lower limb levitation along with sideways turning of the body
